# Supplementary material for: Soil acidification alters C : N : P stoichiometry in the soil due to higher acid sensitivity of phosphorus
Source: Royal Society of Chemistry journal article supplement (doi:10.1039/d4em00394b), 2025-01-01
Supplement: d4em00394b1.xlsx [file d4em00394b1.xlsx]

## Sheet: Sheet1
	SoilType	Treated_pH	Soil pH	SOC	TN	TP	C/N	N/P	C/P	AP	above	below	above/below
Sulfate soil	1	7	4.16	44.609	2.13	0.5	20.9432	4.26	89.218	8.625	9.31	0.94	9.90426
	1	7	4.24	48.5073	2.05	0.49	23.6621	4.18367	98.9944	6.875	8.64	1.54	5.61039
	1	7	3.9	35.0889	2.11	0.48	16.6298	4.39583	73.1018	9.5	8.94	1.02	8.76471
	1	7	3.95	41.42	1.88	0.49	22.0319	3.83673	84.5306	8.33333	9.8	1.35	7.25926
	1	5	4.2	45.0713	1.84	0.48	24.4953	3.83333	93.8986	9.5	7.83	0.91	8.6044
	1	5	4.25	44.1461	1.96	0.458	22.5235	4.27948	96.389	8.625	8.59	1.87	4.59358
	1	5	3.95	40.7491	2.1	0.52	19.4044	4.03846	78.3637	6.875	7.91	1.38	5.73188
	1	5	3.93	46.62	2.14	0.486	21.785	4.40329	95.9259	8.33333	9.21	0.85	10.8353
	1	4	4.2	44.13	2.01	0.42	21.9552	4.78571	105.071	8.75	7.8	1.02	7.64706
	1	4	4.15	46.77	1.85	0.44	25.2811	4.20455	106.295	9	8.18	0.84	9.7381
	1	4	3.85	48.89	1.95	0.43	25.0718	4.53488	113.698	9.875	9.83	0.82	11.9878
	1	4	3.9	43.37	1.83	0.43	23.6995	4.25581	100.86	9.20833	7.97	0.83	9.60241
	1	3	4.03	46.77	2.07	0.3746	22.5942	5.52589	124.853	9.13	4.35	0.33	13.1818
	1	3	3.85	43.15	2.11	0.3424	20.4502	6.16238	126.022	9.75	4.79	0.46	10.413
	1	3	3.97	38.66	2.2	0.3678	17.5727	5.98151	105.111	9.44	4.98	0.8	6.225
	1	3	4.06	42.44	2.02	0.3616	21.0099	5.58628	117.367	9.63	4.84	0.4	12.1
	1	2	3.65	41.5316	1.81	0.3146	22.9457	5.75334	132.014	10.22	2.5	0.51	4.90196
	1	2	3.62	38.676	1.95	0.324	19.8338	6.01852	119.37	11.45	1.94	0.3	6.46667
	1	2	3.49	45.5323	1.83	0.3478	24.881	5.26164	130.915	10.51	2.4	0.36	6.66667
	1	2	3.47	41.13	2.05	0.3288	20.0634	6.23479	125.091	10.62	2.37	0.44	5.38636
Red soil	2	7	4.18	15.8323	1.46	0.5138	10.8441	2.84157	30.8142	31.125	13.93	3.97	3.50882
	2	7	4.14	12.5291	1.44	0.5462	8.70074	2.6364	22.9386	45.25	14.17	3.8	3.72895
	2	7	3.81	14.7767	1.52	0.51	9.7215	2.98039	28.9739	39.875	13.68	3.47	3.94236
	2	7	4.41	13.32	1.54	0.523333	8.64935	2.94268	25.4522	38.75	13.46	4.14	3.25121
	2	5	4.08	16.6115	1.5	0.5368	11.0743	2.79434	30.9454	38	13.79	2.42	5.69835
	2	5	4.04	12.5466	1.46	0.5546	8.59356	2.63253	22.6228	34.125	13.83	2.25	6.14667
	2	5	3.89	13.1233	1.42	0.5706	9.24175	2.48861	22.9991	37.375	14.57	2.8	5.20357
	2	5	4.35	14.71	1.44	0.554	10.2153	2.59928	26.5523	39.66	13.19	2.49	5.29719
	2	4	3.95	15.9071	1.54	0.5368	10.3293	2.86885	29.6332	49.75	12.78	1.27	10.063
	2	4	4.01	14.7785	1.68	0.5146	8.79674	3.26467	28.7185	49.5	11.57	1.54	7.51299
	2	4	3.82	16.2497	1.53	0.4906	10.6207	3.11863	33.122	48.875	12.72	1.98	6.42424
	2	4	3.82	12.76	1.62	0.514	7.87654	3.15175	24.8249	49.375	11.78	1.51	7.80132
	2	3	3.64	13.7238	1.55	0.4368	8.85406	3.54853	31.4189	55.5	5.89	1.09	5.40367
	2	3	3.75	14.5277	1.64	0.4746	8.85833	3.45554	30.6103	55	5.03	0.6	8.38333
	2	3	3.44	11.7459	1.57	0.4906	7.48147	3.20016	23.9419	52.25	6.46	0.76	8.5
	2	3	3.64	12.26	1.52	0.467333	8.06579	3.2525	26.234	54.25	6.74	0.58	11.6207
	2	2	3.27	13.2	1.51	0.4268	8.74172	3.53796	30.9278	61.875	3.51	0.22	15.9545
	2	2	3.13	10.69	1.29	0.4146	8.28682	3.11143	25.7839	53.5	3.98	0.64	6.21875
	2	2	3.48	12.44	1.41	0.406	8.8227	3.47291	30.6404	58	3.08	0.51	6.03922
	2	2	3.35	9.55	1.33	0.39	7.18045	3.41026	24.4872	57.7917	3.58	0.49	7.30612
Lateric red soil	3	7	5.35	14.6944	1.48	0.7704	9.92865	1.92108	19.0737	42.25	17.43	2.93	5.94881
	3	7	5.4	13.6973	1.55	0.74	8.83694	2.09459	18.5098	42.75	14.89	3.09	4.81877
	3	7	4.95	13.3368	1.62	0.73	8.23259	2.21918	18.2696	45.375	18.73	2.93	6.39249
	3	7	5.58	12.74	1.57	0.7468	8.11465	2.1023	17.0595	43.4583	17.85	3.02	5.9106
	3	5	5.05	13.1181	1.43	0.7178	9.17347	1.9922	18.2754	42.75	17.92	2.55	7.02745
	3	5	5.4	14.5895	1.56	0.751	9.35224	2.07723	19.4267	44	16.56	3.17	5.22397
	3	5	5.01	13.7485	1.49	0.748	9.22717	1.99198	18.3803	43.125	19.41	2.68	7.24254
	3	5	5.25	13.37	1.54	0.738933	8.68182	2.08409	18.0936	43.2917	16.29	2.79	5.83871
	3	4	4.93	15.1184	1.52	0.5794	9.94634	2.6234	26.0933	57.54	17.41	3.32	5.24398
	3	4	5.26	13.2945	1.42	0.6484	9.36229	2.19001	20.5035	55.125	18.15	2.76	6.57609
	3	4	5.01	14.4527	1.38	0.6686	10.473	2.06401	21.6163	53.375	15.67	2.81	5.57651
	3	4	4.82	13.56	1.41	0.632133	9.61702	2.23054	21.4512	55.3467	18.69	2.93	6.37884
	3	3	4.32	15.2688	1.86	0.6638	8.20905	2.80205	23.0021	57.54	7.01	0.41	17.0976
	3	3	4.35	13.0383	1.51	0.59	8.63465	2.55932	22.0988	60.125	7.46	0.58	12.8621
	3	3	4.4	12.6376	1.76	0.63	7.18044	2.79365	20.0597	62.375	7.64	0.64	11.9375
	3	3	4.45	12.19	1.66	0.627933	7.34337	2.64359	19.4129	60.0133	8.32	0.61	13.6393
	3	2	3.75	12.9778	1.7	0.5572	7.63401	3.05097	23.2911	63.52	5.16	0.46	11.2174
	3	2	3.74	10.7745	1.82	0.54	5.92004	3.37037	19.9527	59.25	5.29	0.51	10.3725
	3	2	3.53	11.3387	1.77	0.52	6.40603	3.40385	21.8052	62.57	5.48	0.46	11.913
	3	2	3.88	11.52	1.75	0.539067	6.58286	3.24635	21.3703	62.57	4.52	0.3	15.0667
Latosol	4	7	5.54	23.7862	1.89	0.7572	12.5853	2.49604	31.4133	15.25	14.28	3.6	3.96667
	4	7	5.39	24.3081	1.96	0.73	12.4021	2.68493	33.2988	17.625	14.28	3.05	4.68197
	4	7	5.26	26.9975	2.02	0.71	13.3651	2.84507	38.0247	19.75	14.05	3.11	4.51768
	4	7	5.07	27.41	1.92	0.7324	14.276	2.62152	37.4249	17.5417	14.23	3.16	4.50316
	4	5	5.24	23.3481	2.18	0.77	10.7102	2.83117	30.3223	16.125	14.52	3.47	4.18444
	4	5	5.39	24.9955	2.06	0.72	12.1337	2.86111	34.716	19.75	12.43	3.45	3.6029
	4	5	5.06	25.7338	2.01	0.73	12.8029	2.75342	35.2517	16.875	13.78	3.55	3.88169
	4	5	5.17	26.35	1.95	0.74	13.5128	2.63514	35.6081	17.5833	12.82	3.68	3.4837
	4	4	5.15	25.1297	2.32	0.68	10.8318	3.41176	36.9554	21.25	12.5	2.94	4.2517
	4	4	5.27	24.3745	2.12	0.6736	11.4974	3.14727	36.1855	21.5	13.3	3.93	3.38422
	4	4	4.96	26.0266	2.09	0.72	12.4529	2.90278	36.1481	20.5	13.09	3.84	3.40885
	4	4	5.02	25.44	2.2	0.6912	11.5636	3.18287	36.8056	20.86	12.36	3.76	3.28723
	4	3	5.12	24.0175	2.27	0.62	10.5804	3.66129	38.7379	22.33	8.41	1.04	8.08654
	4	3	4.85	22.1163	2.33	0.66	9.49197	3.5303	33.5095	23.55	8.47	0.93	9.10753
	4	3	4.96	26.774	2.39	0.69	11.2025	3.46377	38.8029	22.76	7.12	0.71	10.0282
	4	3	5.06	23.31	2.4	0.656667	9.7125	3.65482	35.4975	22.88	7.78	0.8	9.725
	4	2	3.82	23.06	2.44	0.55	9.45082	4.43636	41.9273	23.87	4.33	0.6	7.21667
	4	2	3.46	24.82	2.2	0.56	11.2818	3.92857	44.3214	24.52	4.72	0.57	8.2807
	4	2	3.38	21.63	2.28	0.54	9.48684	4.22222	40.0556	22.61	5.62	0.58	9.68966
	4	2	3.75	24.42	2.38	0.52	10.2605	4.57692	46.9615	23.6667	5.32	0.63	8.44444
Limestone soil	5	7	6.28	24.8886	2.47	0.8822	10.0763	2.79982	28.212	4.375	11.44	1.87	6.11765
	5	7	5.89	25.0292	2.07	0.83	12.0914	2.49398	30.1557	4.625	10.69	1.85	5.77838
	5	7	6.65	24.4008	2.22	0.86	10.9913	2.5814	28.373	4.75	11.21	2.18	5.1422
	5	7	5.67	26.37	2.17	0.8574	12.1521	2.53091	30.7558	4.58333	11.04	2.03	5.43842
	5	5	6.21	23.5038	2.24	0.8202	10.4928	2.73104	28.6562	4.25	11.29	1.93	5.84974
	5	5	5.73	26.6849	2.12	0.8264	12.5872	2.56534	32.2906	4.45	10.58	2.34	4.52137
	5	5	6.55	25.7785	2.33	0.7656	11.0638	3.04336	33.671	5.02	11.1	1.84	6.03261
	5	5	5.6	24.42	2.25	0.804067	10.8533	2.79828	30.3706	4.61	10.88	2.13	5.10798
	5	4	6.01	26.8092	2.32	0.769	11.5557	3.01691	34.8624	5.25	9.25	1.66	5.57229
	5	4	5.55	23.7754	2.4	0.7576	9.9064	3.1679	31.3825	5.125	8.51	1.61	5.28571
	5	4	6.15	22.9935	2.11	0.8	10.8974	2.6375	28.7418	5.375	8.26	1.68	4.91667
	5	4	5.42	27.03	2.36	0.775533	11.4534	3.04307	34.8534	5.25	9.04	1.57	5.75796
	5	3	6.01	23.5902	2.36	0.71	9.99585	3.32394	33.2256	6.5	3.71	0.42	8.83333
	5	3	5.55	22.6971	2.42	0.656	9.37896	3.68902	34.5992	6.13	5.19	0.65	7.98462
	5	3	6.1	24.5839	2.34	0.672	10.5059	3.48214	36.5832	6.25	3.89	0.59	6.59322
	5	3	5.42	19.36	2.52	0.679333	7.68254	3.70952	28.4985	6.29333	4.21	0.36	11.6944
	5	2	5.41	21.4577	2.62	0.62	8.18997	4.22581	34.6092	7.51	2.54	0.41	6.19512
	5	2	4.85	22.3234	2.51	0.58	8.89379	4.32759	38.4887	6.93	2.72	0.34	8
	5	2	4.96	21.1727	2.57	0.5678	8.23841	4.52624	37.289	7.025	2.52	0.47	5.3617
	5	2	4.71	18.32	2.38	0.61	7.69748	3.90164	30.0328	7.155	2.52	0.49	5.14286
